# Supplementary material
Source: PubMed Central journal article supplement (PMC6704376)
Supplement: NIHMS1534970-supplement-8.pdf [file NIHMS1534970-supplement-8.pdf]

**Table S1. Statistical analyses. Related to Figures 1 and 2.**

| <b>Figure 1</b>                                                                                                                                                                          | Textured NORT  | 1 Hour Ret.    | tPPI           | Air Puff Alone | Open Field Time in Center | EPM Time in Open Arms | EPM Total Arm Crosses | Habituation to Startle Noise | Marble Burying | Sociability    | Social Novelty Preference | Grooming       |
|------------------------------------------------------------------------------------------------------------------------------------------------------------------------------------------|----------------|----------------|----------------|----------------|---------------------------|-----------------------|-----------------------|------------------------------|----------------|----------------|---------------------------|----------------|
| Shank3B <sup>+/+</sup> (control) vs ShankB <sup>+/-</sup>                                                                                                                                | N = 17, 16     | N = 17, 17     | N = 31, 37     | N = 31, 37     | N = 14, 10                | N = 11, 12            | N = 11, 12            | N = 31, 37                   | N = 8, 10      | N = 18, 14     | N = 18, 14                | N = 8, 10      |
|                                                                                                                                                                                          | p = 0.0190     | p = 0.0486     | p = 0.0029     | p = 0.0083     | p = 0.0091                | p = 0.0125            | p = 0.9477            | p = 0.0068                   | p < 0.0001     | p = 0.0237     | p = 0.0110                | p = 0.0016     |
| Shank3 <sup>fl+</sup> (control) vs Cdx2 <sup>Cre</sup> ; Shank3 <sup>fl+</sup>                                                                                                           | N = 13, 13     | N = 11, 13                | N = 11, 13            | N = 11, 13            | N = 11, 13                   | N = 13, 12     | N = 13, 13     | N = 13, 13                | N = 11, 11     |
|                                                                                                                                                                                          | p = 0.0437     | p = 0.7919     | p = 0.0145     | p = 0.0172     | p = 0.0286                | p = 0.0174            | p = 0.2810            | p = 0.0327                   | p = 0.0471     | p = 0.0447     | p = 0.0458                | p = 0.1925     |
| Shank3 <sup>fl+</sup> (control) vs Advillin <sup>Cre</sup> ; Shank3 <sup>fl+</sup> vs Advillin <sup>Cre</sup> ; Shank3 <sup>fl+</sup> vs Advillin <sup>Cre</sup> ; Shank3 <sup>fl+</sup> | N = 37, 20, 9  | N = 34, 26, 9  | N = 30, 25, 9  | N = 30, 25, 9  | N = 38, 25, 9             | N = 34, 20, 9         | N = 34, 20, 9         | N = 30, 25, 9                | N = 34, 21, 9  | N = 36, 26, 9  | N = 36, 26, 9             | N = 8, ---, 9  |
|                                                                                                                                                                                          | F(2,63)=5.826  | F(2,66)=0.3597 | F(2,61)=6.812  | F(2,61)=5.44   | F(2,69)=8.502             | F(2,60)=8.807         | F(2,60)=0.153         | F(2,61)=9.049                | F(2,61)=4.324  | F(2,68)=16.36  | F(2,68)=12.11             | p = 0.3436     |
|                                                                                                                                                                                          | P = 0.0048     | P = 0.6993     | P = 0.0021     | P = 0.0067     | P = 0.0005                | P = 0.0004            | P = 0.8583            | P = 0.0004                   | P = 0.0165     | P < 0.0001     | P < 0.0001                |                |
| Mecp2 <sup>fl+</sup> or fl/y (control) vs Advillin <sup>Cre</sup> ; Mecp2 <sup>fl+</sup> vs Advillin <sup>Cre</sup> ; Mecp2 <sup>fl/y</sup>                                              | N = 35, 20, 18 | N = 33, 17, 18 | N = 41, 24, 20 | N = 41, 24, 20 | N = 38, 20, 20            | N = 32,13,11          | N = 32,13,11          | N = 41, 24, 20               | N = 26, 11, 16 | N = 33, 24, 20 | N = 33, 24, 20            | N = 9, ---, 7  |
|                                                                                                                                                                                          | F(2,70)=5.996  | F(2,65)=0.4695 | F(2,82)=5.104  | F(2,82)=6.226  | F(2,75)=16.5              | F(2,53)=12.02         | F(2,53)=0.214         | F(2,82)=6.391                | F(2,50)=4.219  | F(2,62)=11.73  | F(2,62)=18.8              | p = 0.4667     |
|                                                                                                                                                                                          | P = 0.0039     | P = 0.6274     | P = 0.0081     | P = 0.0030     | P < 0.0001                | P < 0.0001            | P = 0.8083            | P = 0.0026                   | P = 0.0203     | P < 0.0001     | P < 0.0001                |                |
| Shank3 <sup>fl+</sup> (control) vs Shank3 <sup>FX/+</sup> vs Cdx2 <sup>Cre</sup> ; Shank3 <sup>FX/+</sup>                                                                                | N = 22, 24, 23 | N = 24, 24, 29 | N = 22, 21, 26 | N = 22, 21, 26 | N = 21, 24, 22            | N = 22, 23, 22        | N = 22, 23, 22        | N = 22, 21, 26               | N = 21, 18, 21 | N = 21, 25, 29 | N = 21, 25, 29            | N = 21, 26, 29 |
|                                                                                                                                                                                          | F(2,66)=4.231  | F(2,74)=3.924  | F(2,66)=6.496  | F(2,66)=4.316  | F(2,64)=5.694             | F(2,64)=6.679         | F(2,64)=0.914         | F(2,66)=3.488                | F(2,57)=10.4   | F(2,72)=10.25  | F(2,72)=5.61              | F(2,73)=7.824  |
|                                                                                                                                                                                          | P = 0.0187     | P = 0.0240     | P = 0.0027     | P = 0.0173     | P = 0.0053                | P = 0.0023            | P = 0.4061            | P = 0.0363                   | P = 0.0001     | P = 0.0001     | P = 0.0055                | P = 0.0008     |
| Shank3 <sup>fl+</sup> (control) vs Shank3 <sup>FX/+</sup> vs Advillin <sup>Cre</sup> ; Shank3 <sup>FX/+</sup>                                                                            | N = 25, 26, 22 | N = 26, 25, 25 | N = 26, 29, 25 | N = 26, 29, 25 | N = 26, 28, 26            | N = 21, 22, 16        | N = 21, 22, 16        | N = 26, 29, 25               | N = 22, 25, 19 | N = 26, 29, 24 | N = 26, 29, 24            | N = 24, 28, 19 |
|                                                                                                                                                                                          | F(2,70)=4.589  | F(2,73)=1.631  | F(2,77)=7.408  | F(2,77)=7.184  | F(2,77)=4.49              | F(2,56)=5.105         | F(2,56)=1.861         | F(2,77)=3.19                 | F(2,63)=11.83  | F(2,75)=4.385  | F(2,75)=5.208             | F(2,68)=4.709  |
|                                                                                                                                                                                          | P = 0.0134     | P = 0.2027     | P = 0.0011     | P = 0.0014     | P = 0.0143                | P = 0.0092            | P = 0.1649            | P = 0.0466                   | P < 0.0001     | P = 0.0158     | P = 0.0076                | P = 0.0122     |
| HCN1 <sup>+/+</sup> (control) vs HCN1 <sup>+/-</sup> vs HCN1 <sup>-/-</sup>                                                                                                              | N = 16, 14, 6  | not determined (n.d.)     | n.d.                  | n.d.                  | n.d.                         | n.d.           | n.d.           | n.d.                      | n.d.           |
|                                                                                                                                                                                          | F(2,33)=7.604  | F(2,33)=6.308  | F(2,33)=7.064  | F(2,33)=0.2048 | n.d.                      | n.d.                  | n.d.                  | n.d.                         | n.d.           | n.d.           | n.d.                      | n.d.           |
|                                                                                                                                                                                          | P = 0.0028     | P = 0.0048     | P = 0.0028     | P = 0.8158     | n.d.                      | n.d.                  | n.d.                  | n.d.                         | n.d.           | n.d.           | n.d.                      | n.d.           |

| <b>Figures 2D-F and R-V</b>                                                               | PV+ Neuron #, S1 | PV+ Neuron #, V1 | PV+ Neuron #, BLA | E/I Ratio (S1 and V1) | Event Frequency, S1 | Event Frequency, V1 | Event Amplitude, S1 | Event Amplitude, V1 | <b>Figures 2I-K</b>                                                                                             | PV+ Neuron #, S1 | PV+ Neuron #, V1 | PV+ Neuron #, BLA |
|-------------------------------------------------------------------------------------------|------------------|------------------|-------------------|-----------------------|---------------------|---------------------|---------------------|---------------------|-----------------------------------------------------------------------------------------------------------------|------------------|------------------|-------------------|
| Shank3 <sup>fl+</sup> (control) vs Advillin <sup>Cre</sup> ; Shank3 <sup>fl+</sup>        | N = 6, 6         | N = 6, 6         | N = 6, 6          | N = 4, 4              | N = 4, 4            | N = 4, 4            | N = 4, 4            | N = 4, 4            | Shank3 <sup>fl+</sup> (control) vs Shank3 <sup>FX/+</sup> vs Advillin <sup>Cre</sup> ; Shank3 <sup>FX/+</sup>   | N = 4, 4, 4      | N = 4, 4, 4      | N = 4, 4, 4       |
|                                                                                           | p = 0.0115       | p = 0.5561       | p = 0.0012        | F(1,12)=6.254         | F(1,12) = 4.698     | F(1,12)=0.0030      | F(1,12)=9.572       | F(1,12)=0.0739      |                                                                                                                 | F(2,9)=6.206     | F(2,9)=5.794     | F(2,9)=6.945      |
|                                                                                           |                  |                  |                   | P = 0.0254            | P = 0.0459          | P = 0.9569          | P = 0.0093          | P = 0.7904          |                                                                                                                 | P = 0.0202       | P = 0.0241       | P = 0.0150        |
| Mecp2 <sup>fl+</sup> or fl/y (control) vs Advillin <sup>Cre</sup> ; Mecp2 <sup>fl/y</sup> | N = 5, 4         | N = 5, 4         | N = 5, 4          | N = 5, 4              | N = 5, 4            | N = 5, 4            | N = 5, 4            | N = 5, 4            | Mecp2 <sup>fl/y</sup> (control) vs Mecp2 <sup>STOP/y</sup> vs Advillin <sup>Cre</sup> ; Mecp2 <sup>STOP/y</sup> | N = 4, 5, 4      | N = 4, 5, 4      | N = 4, 5, 4       |
|                                                                                           | p = 0.0380       | p = 0.5726       | p = 0.0108        | N(1,14)=5.776         | F(1,14) = 6.822     | F(1,14)=0.3446      | F(1,14)=1.736       | F(1,14)=0.3476      |                                                                                                                 | F(2,10)=30.95    | F(2,10)=4.833    | F(2,10)=7.180     |
|                                                                                           |                  |                  |                   | P = 0.0296            | P = 0.0205          | P = 0.5654          | P = 0.2088          | P = 0.5648          |                                                                                                                 | P < 0.0001       | P = 0.0340       | P = 0.0117        |

**Table S2. Time spent per compartment in the three chamber social interaction test (seconds). Related to Figure 1.**

|                                                           | Novel Mouse      | Novel Object     | Center          | Pref. for novel mouse | Novel Mouse      | Familiar Mouse   | Center          | Pref. for novel mouse |
|-----------------------------------------------------------|------------------|------------------|-----------------|-----------------------|------------------|------------------|-----------------|-----------------------|
| Control (n = 18)                                          | 298.27 +/-15.70  | 232.95 +/- 13.01 | 68.76 +/- 8.26  | Yes<br>p = 0.0044     | 301.41 +/- 16.63 | 220.12 +/- 17.69 | 78.43 +/- 9.72  | Yes<br>p = 0.0010     |
| Shank3B <sup>+/+</sup> (n=14)                             | 259.26 +/- 18.38 | 272.32 +/- 18.32 | 68.38 +/- 17.16 | No<br>p = 0.8332      | 262.77 +/- 24.67 | 258.38 +/- 23.28 | 78.81 +/- 17.39 | No<br>p = 0.9839      |
| Control (n=13)                                            | 320.14 +/- 20.70 | 229.85 +/- 16.07 | 50.01 +/- 5.52  | Yes<br>p = 0.0002     | 302.08 +/- 22.70 | 225.07 +/- 20.20 | 72.85 +/- 8.79  | Yes<br>p = 0.0093     |
| Cdx2 <sup>Cre</sup> ; Shank3 <sup>f/+</sup> (n = 13)      | 296.29 +/- 19.2  | 249.12 +/- 16.43 | 54.56 +/- 7.80  | No<br>p = 0.0826      | 283.41 +/- 15.03 | 250.77 +/- 16.05 | 65.82 +/- 6.72  | No<br>p = 0.4217      |
| Control (n = 36)                                          | 318.59 +/- 7.61  | 229.55 +/- 7.95  | 51.83 +/- 3.51  | Yes<br>p < 0.0001     | 302.31 +/- 10.59 | 233.82 +/- 10.46 | 63.87 +/- 4.38  | Yes<br>p < 0.0001     |
| Advillin <sup>Cre</sup> ; Shank3 <sup>f/+</sup> (n = 26)  | 286.31 +/- 13.00 | 258.17 +/- 12.72 | 55.51 +/- 3.75  | No<br>p = 0.0957      | 275.71 +/- 17.50 | 258.88 +/- 18.17 | 65.37 +/- 7.11  | No<br>p = 0.6429      |
| Advillin <sup>Cre</sup> ; Shank3 <sup>f/f</sup> (n = 9)   | 271.12 +/- 21.95 | 248.43 +/- 23.47 | 80.40 +/- 12.17 | No<br>p = 0.5463      | 250.53 +/- 24.67 | 277.25 +/- 29.16 | 72.22 +/- 16.79 | No<br>p = 0.6647      |
| Control (n = 33)                                          | 292.60 +/- 9.63  | 219.51 +/- 8.59  | 87.79 +/- 6.22  | Yes<br>p < 0.0001     | 300.86 +/- 13.57 | 220.08 +/- 10.79 | 79.05 +/- 4.45  | Yes<br>p < 0.0001     |
| Advillin <sup>Cre</sup> ; Mecp2 <sup>f/+</sup> (n = 24)   | 264.45 +/- 12.41 | 243.93 +/- 12.20 | 90.95 +/- 9.22  | No<br>p = 0.5892      | 260.96 +/- 9.83  | 244.33 +/- 10.15 | 94.69 +/- 7.15  | No<br>p = 0.5861      |
| Advillin <sup>Cre</sup> ; Mecp2 <sup>f/y</sup> (n = 20)   | 265.88 +/- 9.71  | 270.10 +/- 8.46  | 64.02 +/- 10.94 | No<br>p = 0.9517      | 236.62 +/- 16.53 | 264.85 +/- 21.73 | 98.53 +/- 14.45 | No<br>p = 0.3159      |
| Control (n = 21)                                          | 315.54 +/- 10.12 | 233.93 +/- 10.08 | 50.53 +/- 5.27  | Yes<br>p < 0.0001     | 299.85 +/- 16.41 | 233.89 +/- 16.86 | 66.26 +/- 8.22  | Yes<br>p = 0.0102     |
| Shank3 <sup>FX/+</sup> (n = 25)                           | 267.10 +/- 15.00 | 275.67 +/- 15.30 | 57.22 +/- 4.28  | No<br>p = 0.8334      | 264.64 +/- 15.83 | 253.43 +/- 12.56 | 81.89 +/- 7.41  | No<br>p = 0.8429      |
| Cdx2 <sup>Cre</sup> ; Shank3 <sup>FX/+</sup> (n = 29)     | 304.00 +/- 10.74 | 243.52 +/- 11.61 | 52.48 +/- 3.85  | Yes<br>p < 0.0001     | 278.90 +/- 17.34 | 249.11 +/- 19.26 | 71.98 +/- 7.43  | No<br>p = 0.2631      |
| Control (n = 26)                                          | 308.01 +/- 11.38 | 253.89 +/- 11.24 | 38.10 +/- 4.87  | Yes<br>p = 0.0043     | 307.56 +/- 15.49 | 234.56 +/- 15.06 | 57.87 +/- 5.50  | Yes<br>p = 0.0007     |
| Shank3 <sup>FX/+</sup> (n = 29)                           | 279.66 +/- 17.66 | 276.31 +/- 18.40 | 44.03 +/- 3.72  | No<br>p = 0.9761      | 275.36 +/- 17.66 | 260.55 +/- 17.30 | 64.08 +/- 7.82  | No<br>p = 0.7030      |
| Advillin <sup>Cre</sup> ; Shank3 <sup>FX/+</sup> (n = 24) | 304.88 +/- 10.25 | 250.61 +/- 10.03 | 44.51 +/- 4.01  | Yes<br>p = 0.0064     | 294.60 +/- 14.00 | 244.51 +/- 14.63 | 60.88 +/- 7.86  | Yes<br>p = 0.0380     |

**Table S3. Time spent per compartment in the three chamber social interaction test (seconds). Related to Figure 3.**

|                                                                               | Novel Mouse      | Novel Object     | Center          | Pref. for novel mouse | Novel Mouse      | Familiar Mouse   | Center           | Pref. for novel mouse |
|-------------------------------------------------------------------------------|------------------|------------------|-----------------|-----------------------|------------------|------------------|------------------|-----------------------|
| Control<br>(TAM P5, n = 13)                                                   | 349.62 +/- 16.86 | 206.53 +/- 14.34 | 43.80 +/- 5.79  | Yes<br>p < 0.0001     | 322.74 +/- 15.59 | 230.75 +/- 12.99 | 46.51 +/- 5.33   | Yes<br>p < 0.0001     |
| Advillin <sup>CreERT2</sup> ;<br>Shank3 <sup>fl/y</sup><br>(TAM P5, n = 15)   | 286.43 +/- 19.87 | 249.20 +/- 19.90 | 64.37 +/- 9.48  | No<br>p = 0.1944      | 275.27 +/- 19.37 | 257.81 +/- 20.95 | 66.92 +/- 7.10   | No<br>p = 0.6809      |
| Control<br>(TAM P10, n = 21)                                                  | 303.06 +/- 10.55 | 226.48 +/- 8.99  | 70.46 +/- 5.79  | Yes<br>p < 0.0001     | 289.51 +/- 10.38 | 222.13 +/- 9.50  | 88.36 +/- 6.40   | Yes<br>p < 0.0001     |
| Advillin <sup>CreERT2</sup> ;<br>Shank3 <sup>fl/y</sup><br>(TAM P10, n = 15)  | 271.91 +/- 16.14 | 239.42 +/- 16.49 | 88.67 +/- 8.89  | No<br>p = 0.1413      | 250.75 +/- 16.59 | 247.23 +/- 16.91 | 102.02 +/- 9.15  | No<br>p = 0.9782      |
| Control<br>(TAM P28, n = 19)                                                  | 344.57 +/- 14.61 | 200.88 +/- 12.22 | 54.54 +/- 5.06  | Yes<br>p < 0.0001     | 307.33 +/- 14.13 | 221.20 +/- 13.32 | 71.47 +/- 6.20   | Yes<br>p < 0.0001     |
| Advillin <sup>CreERT2</sup> ;<br>Shank3 <sup>fl/y</sup><br>(TAM P28, n = 11)  | 282.90 +/- 16.43 | 228.27 +/- 19.03 | 88.83 +/- 8.00  | Yes<br>p = 0.0321     | 268.47 +/- 21.98 | 255.38 +/- 18.22 | 76.14 +/- 8.23   | No<br>p = 0.8342      |
| Control<br>(TAM P5, n = 14)                                                   | 340.81 +/- 6.10  | 217.48 +/- 8.16  | 41.71 +/- 10.47 | Yes<br>p < 0.0001     | 347.97 +/- 24.46 | 182.43 +/- 20.13 | 69.59 +/- 6.94   | Yes<br>p < 0.0001     |
| Advillin <sup>CreERT2</sup> ;<br>Mecp2 <sup>fl/y</sup><br>(TAM P5, n = 10)    | 265.07 +/- 10.00 | 254.04 +/- 15.60 | 80.89 +/- 8.90  | No<br>p = 0.7007      | 271.75 +/- 14.27 | 232.13 +/- 15.78 | 96.12 +/- 2.59   | No<br>p = 0.3015      |
| Control<br>(TAM P10, n = 28)                                                  | 315.17 +/- 12.39 | 215.41 +/- 11.61 | 69.43 +/- 8.84  | Yes<br>p < 0.0001     | 295.56 +/- 11.41 | 233.80 +/- 12.50 | 70.64 +/- 6.46   | Yes<br>p = 0.0004     |
| Advillin <sup>CreERT2</sup> ;<br>Mecp2 <sup>fl/y</sup><br>(TAM P10, n = 19)   | 293.58 +/- 12.40 | 239.46 +/- 13.44 | 66.95 +/- 9.35  | Yes<br>p = 0.0108     | 243.66 +/- 15.43 | 279.71 +/- 17.94 | 76.64 +/- 6.13   | No<br>p = 0.9980      |
| Control<br>(TAM P28, n = 19)                                                  | 294.83 +/- 7.72  | 221.32 +/- 8.27  | 83.85 +/- 6.45  | Yes<br>p < 0.0001     | 278.09 +/- 9.62  | 218.26 +/- 9.30  | 103.65 +/- 7.45  | Yes<br>p = 0.0029     |
| Advillin <sup>CreERT2</sup> ;<br>Mecp2 <sup>fl/y</sup><br>(TAM P28, n = 15)   | 271.80 +/- 13.30 | 233.79 +/- 11.70 | 94.41 +/- 13.82 | Yes<br>p = 0.0355     | 258.26 +/- 19.11 | 250.20 +/- 22.49 | 91.54 +/- 9.97   | No<br>p = 0.9133      |
| Control<br>(TAM P28, n = 27)                                                  | 311.54 +/- 8.03  | 228.78 +/- 7.46  | 59.66 +/- 5.10  | Yes<br>p < 0.0001     | 321.87 +/- 12.15 | 200.02 +/- 9.20  | 78.10 +/- 6.71   | Yes<br>p < 0.0001     |
| Shank3 <sup>FX/+</sup><br>(TAM P28, n = 16)                                   | 288.40 +/- 23.65 | 261.07 +/- 21.29 | 50.52 +/- 5.20  | No<br>p = 0.3343      | 269.44 +/- 25.01 | 242.85 +/- 21.55 | 87.70 +/- 22.80  | No<br>p = 0.5104      |
| Advillin <sup>CreERT2</sup> ;<br>Shank3 <sup>FX/+</sup><br>(TAM P28, n = 10)  | 322.14 +/- 18.54 | 209.10 +/- 24.33 | 68.76 +/- 8.48  | Yes<br>p < 0.0001     | 261.30 +/- 24.87 | 238.59 +/- 22.72 | 100.11 +/- 12.60 | No<br>p = 0.7423      |
| Control<br>(TAM P28, n = 23)                                                  | 306.43 +/- 12.56 | 195.60 +/- 12.48 | 97.97 +/- 8.83  | Yes<br>p < 0.0001     | 287.16 +/- 18.43 | 220.98 +/- 15.86 | 91.86 +/- 7.81   | Yes<br>p < 0.0014     |
| Mecp2 <sup>STOP/y</sup><br>(TAM P28, n = 13)                                  | 266.50 +/- 20.00 | 241.09 +/- 17.69 | 92.41 +/- 11.19 | No<br>p = 0.5220      | 225.78 +/- 25.47 | 256.42 +/- 32.13 | 117.78 +/- 30.65 | No<br>p = 0.6635      |
| Advillin <sup>CreERT2</sup> ;<br>Mecp2 <sup>STOP/y</sup><br>(TAM P28, n = 10) | 330.98 +/- 20.74 | 203.65 +/- 21.45 | 65.38 +/- 21.45 | Yes<br>p < 0.0001     | 267.65 +/- 37.29 | 239.57 +/- 36.78 | 92.78 +/- 37.43  | No<br>p = 0.7678      |

**Table S4. Statistical analyses. Related to Figures 3 and S3**

|                                                                                                                               | Textured NORT  | 1 Hour Ret.    | tPPI           | Air Puff Alone | Open Field Time in Center | EPM Time in Open Arms | EPM Total Arm Crosses | Habituation to Startle Noise | Marble Burying | Sociability    | Social Novelty Preference |
|-------------------------------------------------------------------------------------------------------------------------------|----------------|----------------|----------------|----------------|---------------------------|-----------------------|-----------------------|------------------------------|----------------|----------------|---------------------------|
| Shank3 <sup>fl/y</sup> (control) vs Advillin <sup>CreERT2</sup> ; Shank3 <sup>fl/y</sup> (TAM P5)                             | N = 8, 15      | N = 8, 15      | N = 10, 15     | N = 10, 15     | N = 8, 14                 | N = 13, 15            | N = 13, 15            | N = 13, 15                   | N = 12, 15     | N = 13, 15     | N = 13, 15                |
|                                                                                                                               | p = 0.0319     | p = 0.9657     | p = 0.0126     | p = 0.0306     | p = 0.0024                | p = 0.0007            | p = 0.6128            | p = 0.0057                   | p = 0.0483     | p = 0.0004     | p = 0.0007                |
| Shank3 <sup>fl/y</sup> (control) vs Advillin <sup>CreERT2</sup> ; Shank3 <sup>fl/y</sup> (TAM P10)                            | N = 20, 14     | N = 17, 14     | N = 20, 14     | N = 20, 14     | N = 25, 14                | N = 17, 11            | N = 17, 11            | N = 23, 14                   | N = 23, 14     | N = 21, 15     | N = 21, 15                |
|                                                                                                                               | p = 0.0128     | p = 0.9789     | p = 0.0294     | p = 0.0362     | p = 0.0489                | p = 0.0189            | p = 0.6092            | p = 0.5227                   | p = 0.0070     | p = 0.0219     | p = 0.0013                |
| Shank3 <sup>fl/y</sup> (control) vs Advillin <sup>CreERT2</sup> ; Shank3 <sup>fl/y</sup> (TAM P28)                            | N = 20, 14     | N = 17, 14     | N = 20, 14     | N = 20, 14     | N = 21, 14                | N = 21, 11            | N = 21, 11            | N = 19, 11                   | N = 18, 11     | N = 19, 11     | N = 19, 11                |
|                                                                                                                               | p = 0.0292     | p = 0.9122     | p = 0.0126     | p = 0.0115     | p = 0.1732                | p = 0.1144            | p = 0.2031            | p = 0.8368                   | p = 0.6816     | p = 0.1592     | p < 0.0001                |
| Mecp2 <sup>fl/y</sup> (control) vs Advillin <sup>CreERT2</sup> ; Mecp2 <sup>fl/y</sup> (TAM P5)                               | N = 14, 10                | N = 14, 10            | N = 14, 10            | N = 14, 10                   | N = 14, 10     | N = 14, 10     | N = 14, 10                |
|                                                                                                                               | p = 0.0074     | p = 0.7196     | p = 0.0021     | p = 0.0010     | p = 0.0026                | p < 0.0001            | p = 0.3922            | p = 0.0012                   | p = 0.0010     | p = 0.0004     | p < 0.0001                |
| Mecp2 <sup>fl/y</sup> (control) vs Advillin <sup>CreERT2</sup> ; Mecp2 <sup>fl/y</sup> (TAM P10)                              | N = 27, 29     | N = 27, 28     | N = 16, 22     | N = 16, 22     | N = 22, 20                | N = 28, 29            | N = 28, 29            | N = 27, 25                   | N = 20, 15     | N = 28, 19     | N = 28, 19                |
|                                                                                                                               | p = 0.0355     | p = 0.6588     | p = 0.0120     | p = 0.0124     | p = 0.0398                | p = 0.0026            | p = 0.1291            | p = 0.1242                   | p = 0.0269     | p = 0.0064     | p = 0.0003                |
| Mecp2 <sup>fl/y</sup> (control) vs Advillin <sup>CreERT2</sup> ; Mecp2 <sup>fl/y</sup> (TAM P28)                              | N = 25, 13     | N = 22, 12                | N = 22, 12            | N = 22, 12            | N = 19, 15                   | N = 17, 15     | N = 19, 15     | N = 19, 15                |
|                                                                                                                               | p = 0.0051     | p = 0.8460     | p = 0.0338     | p = 0.0005     | p = 0.8042                | p = 0.5364            | P = 0.9674            | p = 0.8970                   | p = 0.6079     | p = 0.0272     | p = 0.0024                |
| Shank3 <sup>fl/y</sup> (control) vs Shank3 <sup>FX/+</sup> vs Advillin <sup>CreERT2</sup> ; Shank3 <sup>FX/+</sup> (TAM P28)  | N = 27, 16, 10 | N = 27, 16, 10 | N = 27, 18, 14 | N = 27, 18, 14 | N = 25, 15, 10            | N = 29, 16, 10        | N = 29, 16, 10        | N = 27, 16, 10               | N = 27, 16, 10 | N = 27, 16, 10 | N = 27, 16, 10            |
|                                                                                                                               | F(2,50)=3.648  | F(2,50)=6.130  | F(2,56)=4.193  | F(2,56)=4.318  | F(2,47)=6.597             | F(2,52)=7.242         | F(2,52)=1.758         | F(2,50)=8.214                | F(2,50)=8.548  | F(2,50)=8.028  | F(2,50)=13.87             |
|                                                                                                                               | P = 0.0332     | P = 0.0042     | P = 0.0201     | P = 0.0180     | P = 0.0030                | P = 0.0017            | P = 0.1825            | P = 0.0008                   | P = 0.0006     | P = 0.0009     | p < 0.0001                |
| Mecp2 <sup>fl/y</sup> (control) vs Mecp2 <sup>STOP/y</sup> vs Advillin <sup>CreERT2</sup> ; Mecp2 <sup>STOP/y</sup> (TAM P28) | N = 24, 14, 11 | N = 25, 15, 11 | N = 25, 18, 12 | N = 25, 18, 12 | N = 32, 22, 12            | N = 25, 14, 14        | N = 25, 14, 14        | N = 25, 18, 11               | N = 19, 15, 10 | N = 23, 13, 10 | N = 23, 13, 10            |
|                                                                                                                               | F(2,46)=3.970  | F(2,48)=4.783  | F(2,52)=5.151  | F(2,52)=8.054  | F(2,63)=10.84             | F(2,50)=7.014         | F(2,50)=0.243         | F(2,54)=4.480                | F(2,41)=17.17  | F(2,43)=10.42  | F(2,43)=8.417             |
|                                                                                                                               | P = 0.0257     | P = 0.0128     | P = 0.0091     | P = 0.0009     | P < 0.0001                | P = 0.0021            | P = 0.7856            | P = 0.0158                   | P < 0.0001     | P = 0.0002     | P = 0.0008                |

**Table S5. Statistical analyses. Related to Figures 4, 5 and S5**

| Figures 4 and S5                                                                                         | GABRB3/vGLUT1 coloc.  | Textured NORT  | 1 Hour Ret.    | tPPI          | Air Puff Alone | Open Field Time in Center | EPM Time in Open Arms | EPM Total Arm Crosses | Habituation to Startle Noise | Sociability    | Social Novelty Preference | PV+ Neuron #, S1 | PV+ Neuron #, V1 | PV+ Neuron #, BLA |
|----------------------------------------------------------------------------------------------------------|-----------------------|----------------|----------------|---------------|----------------|---------------------------|-----------------------|-----------------------|------------------------------|----------------|---------------------------|------------------|------------------|-------------------|
| Mecp2 <sup>R/y</sup> (control) vs Mecp2 <sup>C/y</sup> vs Advillin <sup>Cre</sup> ; Mecp2 <sup>C/y</sup> |                       | N = 30, 22, 10 | N = 32, 21, 10 | N = 30, 16, 8 | N = 30, 16, 8  | N = 31, 22, 12            | N = 31, 16, 8         | N = 31, 16, 8         | N = 30, 22, 10               | N = 26, 15, 10 | N = 26, 15, 10            | N = 6, 6, 6      | N = 6, 6, 6      | N = 6, 6, 6       |
|                                                                                                          | N = 5, 5, 19          | F(2,59)=4.671  | F(2,60)=5.974  | F(2,51)=21.42 | F(2,51)=25.90  | F(2,55)=14.53             | F(2,52)=6.615         | F(2,52)=0.729         | F(2,59)=4.689                | F(2,48)=9.428  | F(2,48)=6.188             | F(2,15)=40.32    | F(2,15)=8.162    | F(2,15)=21.18     |
|                                                                                                          | F(2,26)=14.88         | P = 0.0131     | P = 0.0043     | P < 0.0001    | P < 0.0001     | P < 0.0001                | P = 0.0028            | P = 0.4872            | P = 0.0129                   | P = 0.0004     | P = 0.0041                | P < 0.0001       | P = 0.0040       | P < 0.0001        |
| Mecp2 <sup>R/R</sup> (control) vs Mecp2 <sup>R/C</sup> vs Advillin <sup>Cre</sup> ; Mecp2 <sup>R/C</sup> |                       | N = 25, 14, 12 | N = 26, 14, 8  | N = 29, 15, 8 | N = 29, 15, 8  | N = 28, 15, 8             | N = 22, 14, 8         | N = 22, 14, 8         | N = 29, 15, 8                | N = 26, 13, 8  | N = 26, 13, 8             | N = 7, 7, 6      | N = 7, 7, 6      | N = 6, 6, 6       |
|                                                                                                          | not determined (n.d.) | F(2,48)=4.234  | F(2,45)=4.803  | F(2,49)=13.74 | F(2,49)=16.24  | F(2,48)=5.746             | F(2,41)=4.664         | F(2,41)=0.113         | F(2,48)=5.544                | F(2,44)=9.207  | F(2,44)=9.962             | F(2,17)=5.977    | F(2,17)=7.372    | F(2,15)=8.452     |
|                                                                                                          |                       | P = 0.0202     | P = 0.0129     | P < 0.0001    | P < 0.0001     | P = 0.0058                | P = 0.0150            | P = 0.8936            | P = 0.0068                   | P = 0.0005     | P = 0.0003                | P = 0.0108       | P = 0.0050       | P = 0.0035        |

| Figure 5A-D                                                                       | tPPI          | Air Puff Alone | Startle Amplitude | Startle Amplitude (compare to iso) |
|-----------------------------------------------------------------------------------|---------------|----------------|-------------------|------------------------------------|
| Mecp2 <sup>F/y</sup> (control) vs. Advillin <sup>Cre</sup> ; Mecp2 <sup>F/y</sup> | N = 18, 9     | N = 18, 9      | N = 18, 9         | N = 31                             |
|                                                                                   | F(1,50)=38.66 | F(1,50)=8.531  | F(1,50)=14.03     | F(2,90)=3.908                      |
|                                                                                   | P < 0.0001    | P = 0.0047     | P = 0.0004        | P = 0.0236                         |

**Table S6. Statistical analyses. Related to Figures 7 and S7**

|                                                                                                            | Textured NORT  | 1 Hour Ret.    | tPPI           | Air Puff Alone | Open Field Time in Center | EPM Time in Open Arms | EPM Total Arm Crosses | Habituation to Startle Noise | Sociability   | Social Novelty Preference | Marble Burying | Grooming      |
|------------------------------------------------------------------------------------------------------------|----------------|----------------|----------------|----------------|---------------------------|-----------------------|-----------------------|------------------------------|---------------|---------------------------|----------------|---------------|
| Saline-treated: Shank3B <sup>+/+</sup> (control) vs Shank3B <sup>+/-</sup>                                 | N = 12, 16     | N = 12, 17     | N = 12, 17     | N = 12, 17     | N = 14, 15                | N = 12, 17            | N = 12, 17            | N = 12, 17                   | N = 12, 17    | N = 12, 17                | N = 12, 17     | N = 7, 7      |
|                                                                                                            | p = 0.0040     | p = 0.0349     | p = 0.0214     | p = 0.0332     | p = 0.0038                | p = 0.0025            | p = 0.8292            | p = 0.3355                   | p = 0.0026    | p < 0.0001                | p = 0.0004     | p = 0.0320    |
| Isoguvacine-treated: Shank3B <sup>+/+</sup> (control) vs Shank3B <sup>+/-</sup>                            | N = 19, 21                | N = 19, 21            | N = 19, 21            | N = 19, 21                   | N = 19, 21    | N = 19, 21                | N = 19, 21     | N = 10, 11    |
|                                                                                                            | p = 0.0447     | p = 0.0458     | p = 0.8862     | p = 0.1553     | p = 0.0750                | p = 0.9697            | p = 0.8744            | p = 0.3633                   | p = 0.3855    | p = 0.0220                | p = 0.7603     | p = 0.0192    |
| Saline-treated: Mecp2 <sup>R/y or R/R</sup> (control) vs Mecp2 <sup>R/C</sup> vs Mecp2 <sup>C/y</sup>      | N = 34, 11, 10 | N = 34, 11, 10 | N = 35, 14, 11 | N = 35, 14, 11 | N = 34, 16, 11            | N = 35, 11, 10        | N = 35, 11, 10        | N = 35, 11, 10               | N = 29, 10, 8 | N = 29, 10, 8             | N = 29, 9, 9   | N = 8, ---, 7 |
|                                                                                                            | F(2,52)=8.116  | F(2,52)=4.440  | F(2,57)=9.182  | F(2,57)=18.61  | F(2,58)=8.146             | F(2,53)=14.55         | F(2,53)=0.255         | F(2,46)=0.462                | F(2,44)=6.203 | F(2,45)=14.03             | F(2,44)=16.14  | p = 0.4319    |
|                                                                                                            | P = 0.0009     | P = 0.0166     | P = 0.0003     | P < 0.0001     | P = 0.0008                | P < 0.0001            | P = 0.7756            | P = 0.6328                   | P = 0.0042    | p < 0.0001                | P < 0.0001     |               |
| Isoguvacine-treated: Mecp2 <sup>R/y or R/R</sup> (control) vs Mecp2 <sup>R/C</sup> vs Mecp2 <sup>C/y</sup> | N=30, 14, 8    | N = 30, 14, 8  | N = 31, 15, 8  | N = 31, 15, 8  | N = 30, 15, 8             | N = 28, 15, 8         | N = 28, 15, 8         | N = 28, 15, 8                | N = 28, 8, 8  | N = 28, 8, 8              | N = 25, 14, 8  | N = 7, ---, 7 |
|                                                                                                            | F(2,49)=3.708  | F(2,49)=3.251  | F(2,51)=0.719  | F(2,51)=2.671  | F(2,50)=0.376             | F(2,48)=0.765         | F(2,48)=0.175         | F(2,39)=0.206                | F(2,41)=0.975 | F(2,41)=0.337             | F(2,44)=14.53  | p = 0.4002    |
|                                                                                                            | P = 0.0335     | P=0.0472       | P = 0.4920     | P = 0.0789     | P = 0.6886                | P = 0.4708            | P = 0.8484            | P = 0.8144                   | P = 0.3858    | P = 0.7162                | P < 0.0001     |               |

|                                                                                 | PV+ Neuron #, S1 | PV+ Neuron #, V1 | PV+ Neuron #, BLA | E/I Balance, S1 | E/I Balance, V1 | Event Amplitude, S1       | Event Frequency, S1       | Event Amplitude, V1      | Event Frequency, V1      |
|---------------------------------------------------------------------------------|------------------|------------------|-------------------|-----------------|-----------------|---------------------------|---------------------------|--------------------------|--------------------------|
| Saline-treated: Shank3B <sup>+/+</sup> (control) vs Shank3B <sup>+/-</sup>      | N = 4, 5         | N = 4, 5         | N = 4, 4          | N = 4, 4        | N = 4, 4        | N = 4, 4                  | N = 4, 4                  | N = 4, 4                 | N = 4, 4                 |
|                                                                                 | p = 0.0100       | p = 0.0012       | p = 0.0154        | p < 0.0001      | p = 0.0011      | F(1,12)=17.52 ; P=0.0013  | F(1,12)=4.949 ; P=0.0461  | F(1,12)=21.75 ; P=0.0005 | F(1,12)=10.07 ; P=0.0080 |
| Isoguvacine-treated: Shank3B <sup>+/+</sup> (control) vs Shank3B <sup>+/-</sup> | N = 6, 4         | N = 6, 4         | N = 4, 4          | N = 4, 4        | N = 4, 4        | N = 4, 4                  | N = 4, 4                  | N = 4, 4                 | N = 4, 4                 |
|                                                                                 | p = 0.0582       | p = 0.0023       | p = 0.0066        | p = 0.1086      | p = 0.0003      | F(1,12)=0.2058 ; P=0.6582 | F(1,12)=6.922 ; P=0.0219  | F(1,12)=17.78 ; P=0.0012 | F(1,12)=19.09 ; P=0.0009 |
| Saline-treated: Mecp2 <sup>R/y</sup> (control) vs Mecp2 <sup>C/y</sup>          | N = 4, 4         | N = 4, 4         | N = 4, 4          | N = 4, 4        | N = 4, 4        | N = 4, 4                  | N = 4, 4                  | N = 4, 4                 | N = 4, 4                 |
|                                                                                 | p = 0.0384       | p = 0.0146       | p = 0.0012        | p = 0.0006      | p = 0.0016      | F(1,12)=0.2084 ; P=0.6562 | F(1,12)=15.94 ; P=0.0018  | F(1,12)=2.551 ; P=0.1362 | F(1,12)=9.131 ; P=0.0106 |
| Isoguvacine-treated: Mecp2 <sup>R/y</sup> (control) vs Mecp2 <sup>C/y</sup>     | N = 4, 4         | N = 4, 4         | N = 4, 4          | N = 4, 4        | N = 4, 4        | N = 4, 4                  | N = 4, 4                  | N = 4, 4                 | N = 4, 4                 |
|                                                                                 | p = 0.1504       | p = 0.0089       | p = 0.0194        | p = 0.3652      | p = 0.0117      | F(1,12)=1.740 ; P=0.2118  | F(1,12)=0.2264 ; P=0.6428 | F(1,12)=1.155 ; P=0.3036 | F(1,12)=4.863 ; P=0.0477 |

**Table S7. Summary of findings. Related to all figures.**

|                                                                           | Hairy Skin Sensitivity | Texture Discrimination | Anxiety-like Behaviors | Sociability | Social Novelty | Marble Burying | Grooming | PV+ Neuron #, S1 | PV+ Neuron #, BLA | PV+ Neuron #, V1 | E/I Balance S1 | E/I Balance V1 |
|---------------------------------------------------------------------------|------------------------|------------------------|------------------------|-------------|----------------|----------------|----------|------------------|-------------------|------------------|----------------|----------------|
| Germline Mutants                                                          |                        |                        |                        |             |                |                |          |                  |                   |                  |                |                |
| Shank3 <sup>B<sup>-/-</sup></sup>                                         | ↑                      | ↓                      | ↑                      | ↓           | ↓              | ↓              | ↑        | ↓                | ↓                 | ↓                | ↓              | ↓              |
| Shank3 <sup>FX/+</sup>                                                    | ↑                      | ↓                      | ↑                      | ↓           | ↓              | ↓              | ↑        | ↓                | ↓                 | ↓                | n.d.           | n.d.           |
| Mecp2 <sup>STOP/y</sup>                                                   | ↑                      | ↓                      | ↑                      | ↓           | ↓              | ↓              | ---      | ↑                | ↓                 | ↑                | n.d.           | n.d.           |
| Mecp2 <sup>R/C or C/y</sup>                                               | ↑                      | ↓                      | ↑                      | ↓           | ↓              | ↓              | ---      | ↑                | ↓                 | ↑                | ↓              | ↓              |
| Conditional Deletions                                                     |                        |                        |                        |             |                |                |          |                  |                   |                  |                |                |
| Cdx2 <sup>Cre</sup> ; Shank3 <sup>B<sup>+/+</sup></sup>                   | ↑                      | ↓                      | ↑                      | ↓           | ↓              | ↓              | ---      | n.d.             | n.d.              | n.d.             | n.d.           | n.d.           |
| Advillin <sup>Cre</sup> ; Shank3 <sup>B<sup>+/+</sup></sup>               | ↑                      | ↓                      | ↑                      | ↓           | ↓              | ↓              | n.d.     | ↓                | ↓                 | ---              | ↓              | ---            |
| Advillin <sup>Cre</sup> ; Shank3 <sup>B<sup>fl</sup></sup>                | ↑                      | ↓                      | ↑                      | ↓           | ↓              | ↓              | ---      | n.d.             | n.d.              | n.d.             | n.d.           | n.d.           |
| Advillin <sup>CreERT2</sup> ; Shank3 <sup>B<sup>+/+</sup></sup> (TAM P5)  | ↑                      | ↓                      | ↑                      | ↓           | ↓              | ↓              | n.d.     | ↓                | ↓                 | ---              | n.d.           | n.d.           |
| Advillin <sup>CreERT2</sup> ; Shank3 <sup>B<sup>+/+</sup></sup> (TAM P10) | ↑                      | ↓                      | ↓                      | ↓           | ↓              | ↑              | n.d.     | ↓                | ↑                 | ---              | n.d.           | n.d.           |
| Advillin <sup>CreERT2</sup> ; Shank3 <sup>B<sup>+/+</sup></sup> (TAM P28) | ↑                      | ↓                      | ---                    | ---         | ↓              | ---            | n.d.     | ↓                | ---               | ---              | n.d.           | n.d.           |
| Advillin <sup>Cre</sup> ; Mecp2 <sup>B<sup>+/+</sup></sup>                | ↑                      | ↓                      | ↑                      | ↓           | ↓              | ---            | n.d.     | n.d.             | n.d.              | n.d.             | n.d.           | n.d.           |
| Advillin <sup>Cre</sup> ; Mecp2 <sup>B<sup>y</sup></sup>                  | ↑                      | ↓                      | ↑                      | ↓           | ↓              | ↓              | ---      | ↑                | ↓                 | ---              | ↓              | ---            |
| Advillin <sup>CreERT2</sup> ; Mecp2 <sup>B<sup>y</sup></sup> (TAM P5)     | ↑                      | ↓                      | ↑                      | ↓           | ↓              | ↓              | n.d.     | ↑                | ↓                 | ---              | n.d.           | n.d.           |
| Advillin <sup>CreERT2</sup> ; Mecp2 <sup>B<sup>y</sup></sup> (TAM P10)    | ↑                      | ↓                      | ↓                      | +/-         | ↓              | ↑              | n.d.     | ↓                | ↑                 | ---              | n.d.           | n.d.           |
| Advillin <sup>CreERT2</sup> ; Mecp2 <sup>B<sup>y</sup></sup> (TAM P28)    | ↑                      | ↓                      | ---                    | ---         | ↓              | ---            | n.d.     | ↓                | ---               | ---              | n.d.           | n.d.           |
| Genetic Rescues                                                           |                        |                        |                        |             |                |                |          |                  |                   |                  |                |                |
| Shank3 <sup>FX/+</sup>                                                    | ↑                      | ↓                      | ↑                      | ↓           | ↓              | ↓              | ↑        | ↓                | ↓                 | ↓                | ↓              | ↓              |
| Cdx2 <sup>Cre</sup> ; Shank3 <sup>FX/+</sup>                              | ---                    | ---                    | ---                    | ---         | +/-            | +/-            | ↑        | n.d.             | n.d.              | n.d.             | n.d.           | n.d.           |
| Advillin <sup>Cre</sup> ; Shank3 <sup>FX/+</sup>                          | ---                    | ---                    | ---                    | ---         | +/-            | +/-            | ↑        | ---              | ---               | ↓                | n.d.           | n.d.           |
| Advillin <sup>CreERT2</sup> ; Shank3 <sup>FX/+</sup> (TAM P28)            | ---                    | ↓                      | ↑                      | ---         | ↓              | ↓              | n.d.     | ---              | ↓                 | ↓                | n.d.           | n.d.           |
| Mecp2 <sup>STOP/y</sup>                                                   | ↑                      | ↓                      | ↑                      | ↓           | ↓              | ↓              | ---      | ↑                | ↓                 | ↑                | ↓              | ↓              |
| Advillin <sup>Cre</sup> Mecp2 <sup>STOP/y</sup>                           | ---                    | ---                    | ---                    | ---         | ---            | n.d.           | n.d.     | +/-              | ---               | ↑                | n.d.           | n.d.           |
| Advillin <sup>CreERT2</sup> ; Mecp2 <sup>STOP/y</sup> (TAM P28)           | ---                    | ↓                      | ↑                      | ---         | ↓              | ↓              | n.d.     | +/-              | ↓                 | ↑                | n.d.           | n.d.           |
| Viral Rescues                                                             |                        |                        |                        |             |                |                |          |                  |                   |                  |                |                |
| Mecp2 <sup>R/C or C/y</sup>                                               | ↑                      | ↓                      | ↑                      | ↓           | ↓              | ↓              | ---      | ↑                | ↑                 | ↑                | n.d.           | n.d.           |
| Advillin <sup>Cre</sup> ; Mecp2 <sup>R/C</sup>                            | ---                    | ---                    | ---                    | ---         | ---            | n.d.           | n.d.     | ---              | ---               | ↑                | n.d.           | n.d.           |
| Advillin <sup>Cre</sup> ; Mecp2 <sup>C/y</sup>                            | ---                    | ---                    | ---                    | ---         | +/-            | n.d.           | n.d.     | +/-              | +/-               | ↑                | n.d.           | n.d.           |
| Pharmacological Rescues                                                   |                        |                        |                        |             |                |                |          |                  |                   |                  |                |                |
| Shank3B <sup>+/-</sup> + saline                                           | ↑                      | ↓                      | ↑                      | ↓           | ↓              | ↓              | ↑        | ↓                | ↓                 | ↓                | ↓              | ↓              |
| Shank3B <sup>+/-</sup> + iso                                              | ---                    | ↓                      | ---                    | ---         | ---            | ---            | ---      | ---              | ---               | ↓                | ---            | ↓              |
| Mecp2 <sup>R/C or C/y</sup> + saline                                      | ↑                      | ↓                      | ↑                      | ↓           | ↓              | ↓              | ---      | ↑                | ↑                 | ↑                | ↓              | ↓              |
| Mecp2 <sup>R/C or C/y</sup> + iso                                         | ---                    | ↓                      | ---                    | ---         | ---            | ↓              | ---      | ---              | ---               | ↑                | ---            | ↓              |

(↑, increased; ↓, decreased; +/-, intermediate phenotype; ---, not different than control littermates; n.d., not determined; \*, findings observed in Orefice et al., 2016)

**Table S8. Oligonucleotide List. Related to Key Resources Table.**

| Mouse Line                        | Oligo               | Sequence (5' to 3')                  |
|-----------------------------------|---------------------|--------------------------------------|
| <i>Advillin<sup>Cre</sup></i>     | transgene forward   | CCC TGT TCA CTG TGA GTA GG           |
|                                   | transgene reverse   | AGT ATC TGG TAG GTG CTT CCA G        |
|                                   | internal control    | GCG ATC CCT GAA CAT GTC CAT C        |
| <i>Advillin<sup>CreERT2</sup></i> | AdvilCreERT2_1      | CCC TGT TCA CTG TGA GTA GG           |
|                                   | AdvilCreERT2_2      | AGT ATC TGG TAG GTG CTT CCA G        |
|                                   | AdvilCreERT2_3      | GCG ATC CCT GAA CAT GTC CAT C        |
| <i>Cdx2<sup>Cre</sup></i>         | forward             | CTC GAC GTC TCC AAC CAT TG           |
|                                   | reverse             | ATC TTC AGG TTC TGC GGG AA           |
| <i>Cntnap2 null</i>               | wild type forward   | TGC CCT CCT AGA AAG TAA ATG C T      |
|                                   | mutant forward      | GCC AGA GGC CAC TTG TGT AG           |
|                                   | common reverse      | TCC TCT CTT CAT GCA CAC TAT GA       |
| <i>Fmr1 null</i>                  | mutant forward      | CAC GAG ACT AGT GAG ACG TG           |
|                                   | wild type forward   | TGT GAT AGA ATA TGC AGC ATG TGA      |
|                                   | common reverse      | CTT CTG GCA CCT CCA GCT T            |
| <i>Gabrb3<sup>floxed</sup></i>    | forward             | ATT CGC CTG AGA CCC GAC T            |
|                                   | reverse             | GTT CAT CCC CAC GCA GAC              |
| <i>Hcn1 null</i>                  | mutant forward      | AGA GAA ATC ATT CCC CGT GA           |
|                                   | wild type forward   | CAC CTG CTA CGC AAT GTT TG           |
|                                   | common reverse      | ATT GGG CAC TAC ACG CTA GG           |
| <i>Mecp2<sup>floxed</sup></i>     | forward             | TGG TAA AGA CCC ATG TGA CCC AAG      |
|                                   | reverse             | GGC TTG CCA CAT GAC AAG AC           |
|                                   | post-Cre excision   | TCC ACC TAG CCT GCC TGT ACT TTG      |
| <i>Mecp2<sup>R306C</sup></i>      | forward             | GGA TTG TGG AAA AGC CAG              |
|                                   | reverse             | ATG ACC TGG GCA GAT GTG GTA G        |
| <i>Mecp2<sup>STOP</sup></i>       | forward common      | AAC AGT GCC AGC TGC TCT TC           |
|                                   | wild type reverse   | CTG TAT CCT TGG GTC AAG CTG          |
|                                   | mutant reverse      | GCC AGA GGC CAC TTG TGT AG           |
| <i>Shank3<sup>floxed</sup></i>    | pFW (Sh3cKO) Gen 1a | CAGCATTTATACCTGACTGTGAAGC            |
|                                   | pRV (Sh3cKO) Gen 3b | GGGAGTAGAGCTCAGATAACC                |
| <i>Shank3B null</i>               | common forward      | GAG ACT GAT CAG CGC AGT TG           |
|                                   | wild type reverse   | TGA CAT AAT CGC TGG CAA AG           |
|                                   | mutant reverse      | GCT ATA CGA AGT TAT GTC GAC TAG<br>G |
| <i>Shank3<sup>Δex4-9</sup></i>    | common forward      | TGG GAT GTG AGA GTG ACC AG           |
|                                   | wild type reverse   | AGG AGG TCA GTG GCG TTG T            |
|                                   | mutant reverse      | AAT TCT GTT CAG TCC ACA CAG G        |
| <i>Shank3<sup>FX</sup></i>        | common forward      | CGT TTG ACA CAC ATA AGC ACC          |
|                                   | wild type reverse   | CTC CAC CTA GCT GAA TTT CCC          |



**Table S8. Oligonucleotide List. Related to Key Resources Table.**

|                                  |                                  |                                 |
|----------------------------------|----------------------------------|---------------------------------|
|                                  | FX mutant reverse                | GCT GAC ATC ACA TTG CTG CC      |
|                                  | FX rescue forward                | CGT TTG ACA CAC ATA AGC ACC     |
|                                  | FX rescue reverse (wildtype rvs) | CTC CAC CTA GCT GAA TTT CCC     |
| <i>16<sup>p11.2df</sup> null</i> | mutant forward                   | ACC TGG TAT TGA ATG CTT GC      |
|                                  | wild type forward                | CCT GAG CCT CTT GAG TGT CC      |
|                                  | mutant reverse                   | TGG TAT CTC CAT AAG ACA GAA TGC |
|                                  | wild type reverse                | GTC GGT TCA GGT GGT AGA CG      |
